# Supplementary material for: Preimplantation genetic testing and child health: a national register-based study
Source: PubMed Central journal article supplement — Hum Reprod. 2023 Feb 7;38(4):739–50. doi: 10.1093/humrep/dead021 (PMC10068295; doi:10.1093/humrep/dead021), 2023-02-07
Supplement: dead021_supplementary_table_si.pdf [file dead021_supplementary_table_si.pdf]

**Supplementary Table SI ICD-codes for maternal and early childhood outcomes.**

**Hypertensive disorders of pregnancy, including pregnancy-induced hypertension and preeclampsia**

ICD-9 codes: 642A–B, 642D, 642X, 642E–H

ICD-10 codes: O13–O15

**Placenta praevia**

ICD-9 codes: 641A–B

ICD-10 code: O44

**Placental abruption**

ICD-9 code: 641C

ICD-10 code: O45

**Postpartum haemorrhage**

ICD-9 codes: 666A–D

ICD-10 codes: O67.8 and O72

**Asthma**

ICD-9 codes: 493A–B, 493X

ICD-10 codes: J45.0, J46.9

**Allergic disorders**

ICD-9 codes: 372, 477, 558, 691, 708A, 995A–B

ICD-10 codes: H10.1, J30, K52.2, L20, L50.0, T78.0–78.9

**Sepsis**

ICD-9 codes: 038

ICD-10 codes: A40–41

**Hypothyroidism**

ICD-9 codes: 243, 244A–D, 244W, 244X

ICD-10 codes: E03.0, E03.1, E03.8, E03.9

**Attention deficit hyperactivity disorder**

ICD-9 code: 314

ICD-10 codes: F90, F98.9

**Autism spectrum disorders**

ICD-9 code: 299

ICD-10 codes: F84.0, F84.1, F84.5, F84.8–84.9

**Affective disorders**

ICD-9 codes: 296, 300E, 311

ICD-10 codes: F30–39

**Schizophrenia**

ICD-9 codes: 295, 297, 298B, 298C, 298E, 298W, 298X, 299

ICD-10 codes: F20–29

**Mental retardation**

ICD-9 codes: 317–319

ICD-10 codes: F70–F79

**Cerebral palsy**

ICD-9 code: 343

ICD-10 code: G80

**Epilepsy**

ICD-9 code: 345

ICD-10 codes: G40–41
